# Supplementary material for: Has the construction of National Independent Innovation Demonstration Zones reduced the urban carbon emissions? A quasi-natural experiment in China
Source: Research Square preprint supplement (doi:10.21203/rs.3.rs-1520158/v1), 2022-04-26
Supplement: Supplementary file 1 [file b17cc0be5c3fcc1b4e46765a.docx]

**Full regression results for the mechanism analysis**

**Table S.1**

| Variables | (1) | (2) | (3) | (4) | (5) | (6) |
| --- | --- | --- | --- | --- | --- | --- |
|  | *lncar* | *lni* | *lncar* | *lnpcar* | *lni* | *lnpcar* |
| *treat* | -0.068*** | 0.215*** | -0.065*** | -0.067*** | 0.215*** | -0.063*** |
|  | (0.013) | (0.058) | (0.013) | (0.012) | (0.058) | (0.012) |
| *lni* |  |  | -0.012** | -0.099*** | -0.658*** | -0.113*** |
|  |  |  | (0.005) | (0.037) | (0.150) | (0.037) |
| *lnrgdp* | 0.365*** | -0.658*** | 0.357*** | 0.105* | -0.139 | 0.102 |
|  | (0.055) | (0.150) | (0.055) | (0.063) | (0.165) | (0.062) |
| *lnpd* | 0.242* | -0.139 | 0.240* | -0.533** | 8.080*** | -0.363 |
|  | (0.125) | (0.165) | (0.124) | (0.242) | (2.189) | (0.235) |
| *sci* | -0.224 | 8.080*** | -0.127 | 0.021* | 0.085*** | 0.023** |
|  | (0.220) | (2.189) | (0.224) | (0.011) | (0.030) | (0.011) |
| *finc* | 0.001 | 0.085*** | 0.002 | 0.057*** | 0.038* | 0.058*** |
|  | (0.007) | (0.030) | (0.007) | (0.006) | (0.022) | (0.006) |
| *lnene* | 0.060*** | 0.038* | 0.061*** | 1.765*** | 6.018*** | 1.891*** |
|  | (0.006) | (0.022) | (0.006) | (0.397) | (1.455) | (0.395) |
| *Constant* | 12.740*** | 6.018*** | 12.812*** | -0.067*** | 0.215*** | -0.063*** |
|  | (0.647) | (1.455) | (0.645) | (0.012) | (0.058) | (0.012) |
| *Control variables* | Yes | Yes | Yes | Yes | Yes | Yes |
| *City FE* | Yes | Yes | Yes | Yes | Yes | Yes |
| *Year FE* | Yes | Yes | Yes | Yes | Yes | Yes |
| *N* | 3,990 | 3,990 | 3,990 | 3,990 | 3,990 | 3,990 |
|  | 0.989 | 0.967 | 0.989 | 0.982 | 0.967 | 0.982 |

Notes: ***, ** and * indicate statistical at 1 %, 5 % and 10 % levels, respectively. Standard errors clustered at the city-year level are in parentheses.

**Table S.2**

| Variables | (1) | (2) | (3) | (4) | (5) | (6) |
| --- | --- | --- | --- | --- | --- | --- |
|  | *lncar* | *sind* | *lncar* | *lnpcar* | *sind* | *lnpcar* |
| *treat* | -0.055*** | -1.741*** | -0.048*** | -0.060*** | -1.741*** | -0.058*** |
|  | (0.011) | (0.525) | (0.010) | (0.010) | (0.525) | (0.010) |
| *sind* |  |  | 0.004*** |  |  | 0.001*** |
|  |  |  | (0.000) |  |  | (0.000) |
| *lnrgdp* | 0.352*** | 22.457*** | 0.267*** | -0.112*** | 22.457*** | -0.139*** |
|  | (0.049) | (2.189) | (0.050) | (0.033) | (2.189) | (0.037) |
| *lnpd* | 0.269** | 7.050 | 0.242** | 0.116* | 7.050 | 0.108* |
|  | (0.121) | (4.299) | (0.108) | (0.060) | (4.299) | (0.058) |
| *sci* | -0.254 | -6.908 | -0.228 | -0.670*** | -6.908 | -0.662*** |
|  | (0.219) | (8.935) | (0.227) | (0.253) | (8.935) | (0.253) |
| *finc* | -0.001 | -0.719*** | 0.002 | 0.001 | -0.719*** | 0.002 |
|  | (0.005) | (0.223) | (0.005) | (0.004) | (0.223) | (0.004) |
| *lnene* | 0.057*** | 1.458*** | 0.051*** | 0.053*** | 1.458*** | 0.051*** |
|  | (0.005) | (0.257) | (0.005) | (0.005) | (0.257) | (0.005) |
| *Constant* | 12.848*** | -182.123*** | 13.531*** | 1.888*** | -182.123*** | 2.110*** |
|  | (0.587) | (23.171) | (0.571) | (0.359) | (23.171) | (0.385) |
| *Control variables* | Yes | Yes | Yes | Yes | Yes | Yes |
| *City FE* | Yes | Yes | Yes | Yes | Yes | Yes |
| *Year FE* | Yes | Yes | Yes | Yes | Yes | Yes |
| *N* | 4,275 | 4,275 | 4,275 | 4,275 | 4,275 | 4,275 |
|  | 0.989 | 0.858 | 0.989 | 0.981 | 0.858 | 0.981 |

Notes: ***, ** and * indicate statistical at 1 %, 5 % and 10 % levels, respectively. Standard errors clustered at the city-year level are in parentheses.

**Table S.3**

| Variables | (1) | (2) | (3) | (4) | (5) | (6) |
| --- | --- | --- | --- | --- | --- | --- |
|  | *lncar* | *instr* | *lncar* | *lnpcar* | *instr* | *lnpcar* |
| *treat* | -0.055*** | 0.092*** | -0.050*** | -0.060*** | 0.092*** | -0.060*** |
|  | (0.011) | (0.026) | (0.010) | (0.010) | (0.026) | (0.010) |
| *instr* |  |  | -0.054*** |  |  | -0.003 |
|  |  |  | (0.015) |  |  | (0.013) |
| *lnrgdp* | 0.352*** | -0.723*** | 0.312*** | -0.112*** | -0.723*** | -0.114*** |
|  | (0.049) | (0.084) | (0.050) | (0.033) | (0.084) | (0.036) |
| *lnpd* | 0.269** | -0.094 | 0.264** | 0.116* | -0.094 | 0.116* |
|  | (0.121) | (0.132) | (0.116) | (0.060) | (0.132) | (0.060) |
| *sci* | -0.254 | 0.194 | -0.243 | -0.670*** | 0.194 | -0.670*** |
|  | (0.219) | (0.487) | (0.236) | (0.253) | (0.487) | (0.253) |
| *finc* | -0.001 | 0.038*** | 0.001 | 0.001 | 0.038*** | 0.001 |
|  | (0.005) | (0.011) | (0.005) | (0.004) | (0.011) | (0.004) |
| *lnene* | 0.057*** | -0.031*** | 0.055*** | 0.053*** | -0.031*** | 0.053*** |
|  | (0.005) | (0.010) | (0.005) | (0.005) | (0.010) | (0.005) |
| *Constant* | 12.848*** | 8.075*** | 13.287*** | 1.888*** | 8.075*** | 1.916*** |
|  | (0.587) | (0.844) | (0.597) | (0.359) | (0.844) | (0.387) |
| *Control variables* | Yes | Yes | Yes | Yes | Yes | Yes |
| *City FE* | Yes | Yes | Yes | Yes | Yes | Yes |
| *Year FE* | Yes | Yes | Yes | Yes | Yes | Yes |
| *N* | 4,275 | 4,275 | 4,275 | 4,275 | 4,275 | 4,275 |
|  | 0.989 | 0.832 | 0.989 | 0.981 | 0.832 | 0.981 |

Notes: ***, ** and * indicate statistical at 1 %, 5 % and 10 % levels, respectively. Standard errors clustered at the city-year level are in parentheses.
